# Supplementary material for: A Premalignant Cell-Based Model for Functionalization and Classification of PTEN Variants
Source: Oxford University Press journal article supplement (doi:10.1158/0008-5472.can-19-3278), 2020-05-04
Supplement: 00085472can193278-sup-230964_4_supp_6226464_q8qrls.xlsx [file 00085472can193278-sup-230964_4_supp_6226464_q8qrls.xlsx]

## Sheet: Table 2_ref_data
variant	MCF10A score	CADD	SNAP2	PolyPhen	SIFT	WT_RSA (%)	WT_DEPTH (_)	WT_OSP	MT_RSA (%)	MT_DEPTH (_)	MT_OSP	ground truth	SVM
K6E	0.3311	26.6	67	0.155	0.99								1
K6I	0.4544	27.3	64	0.244	1								1
R15S	0.387	25	65	0.123	1	53.3	3.6	0.32	52.3	3.6	0.37	1	1
M35V	0.3606	25	44	0.914	1	0	10.8	0.53	2.7	10.3	0.5	1	1
P38H	0.3521	26.1	44	1	1	0	10.5	0.6	0	11.3	0.62		1
G44D	0.6232	26	65	0.968	1	117.5	3.4	0.14	98.9	3.3	0.12	2	1
A79T	0.5711	23	-95	0.005	0.41	86.3	3.1	0.19	80.2	3.2	0.19		1
D92N	0.2677	28.8	90	1	1	44.3	3.7	0.32	44.6	3.9	0.34		0
H93Q	0.3301	26.1	77	1	1	74.5	3.4	0.22	78	3.5	0.21		1
H93R	0.393	27	83	0.998	0.97	74.5	3.4	0.22	79.1	3.4	0.16		1
I101F	0.8803	26	6	0.998	1	0.2	8.7	0.49	0.8	8.8	0.56		2
I101T	0.7138	29	44	0.998	1	0.2	8.7	0.49	2.8	8.4	0.44		2
N117S	0.4916	21	-92	0.096	0.27	25.3	4	0.51	10.1	4	0.53		1
H123Q	0.9934	25	82	0.998	0.98	0	11	0.6	0	11.4	0.64	2	2
H123Y	0.6383	25	80	0.996	1	0	11	0.6	0	12.1	0.58	2	1
C124S	0.8797	27.3	83	1	1	4.3	6.7	0.52	4.3	7.3	0.54	2	2
C124R	0.6986	28	98	0.999	1	4.3	6.7	0.52	8.1	5.8	0.48	2	1
A126D	0.5325	28.2	76	1	1	55.7	3.1	0.23	68.7	3.5	0.21		1
G127R	0.9753	29	91	1	1	0	5.2	0.49	0	8.3	0.74	1	2
G129R	0.8214	29	92	1	1	18.3	6.1	0.44	23.3	4.7	0.37	2	2
G129E	0.8841	32	95	1	1	18.3	6.1	0.44	4.5	7.3	0.61	2	2
R130Q	0.5361	34	96	0.998	0.98	3.1	6.5	0.49	11.6	6.8	0.49	2	1
R130P	0.9134	34	93	0.999	1	3.1	6.5	0.49	15.6	6.3	0.44	1	2
R130L	0.4728	34	92	0.999	1	3.1	6.5	0.49	8	6.9	0.47	2	1
T131I	0.4788	26	80	0.999	0.98	0	9.1	0.59	0	9.1	0.64	2	1
G132D	0.6304	31	92	1	0.97	0	11	0.64	0	10.4	0.72	1	1
V133I	1.027	24.7	-13	0.997	0.97	0	10.8	0.49	0.7	10.6	0.56		2
M134I	0.6386	27	-15	0.977	1	0	10.5	0.53	0	11.4	0.56	1	1
I135V	0.379	23	-72	0.987	0.72	0	10.9	0.54	0.5	11.3	0.5	1	1
Y138L	0.5535		44	0.999	1	4.3	6.3	0.55	1.4	7	0.52		1
R142W	0.5259	32	66	0.995	0.99	66.6	3.7	0.16	62.8	3.7	0.16		1
Y155C	0.5901	33	22	0.999	1	0	8.7	0.51	4	9.1	0.39	1	1
T167N	0.5664	26	45	0.955	1	32.8	3.7	0.29	34.3	3.8	0.28	2	1
Q171E	0.3313	25.1	45	0.956	0.99	1.3	7	0.55	0.5	7.5	0.56		1
R173H	0.2672	34	54	0.966	0.97	16.4	4.4	0.45	34.9	4.3	0.34	2	0
Y176C	0.5603	23	-47	0	0.81	52.3	3.6	0.33	75.7	3.3	0.28		1
Y180H	0.1171	23	-78	0	0.47	54	3.8	0.35	54.7	3.6	0.33	0	0
M198I	0.1821	22	-85	0.001	0	0	11.3	0.55	0	11	0.52	0	0
N228S	0.1243	18	-78	0.007	0.26	108.4	3.3	0.15	105.2	3	0.15	0	0
T232A	0.4495	23	-10	0.019	0.83	49.6	3.9	0.27	53.1	3.5	0.18		1
P246L	0.6162	22	35	0.116	0.94	45.3	3.4	0.27	55.1	3.7	0.28	2	1
N262S	0.1021	23	-63	0.007	0.79	86.7	3.4	0.2	85.1	3.3	0.19	0	0
D268E	0.108	18	-89	0.007	0	55.5	3.6	0.3	51	3.5	0.28	0	0
D326N	0.7214	30	74	1	0	1.9	5.9	0.51	2.3	5.7	0.5		2
K342N	1.072	33	62	0.979	0.96	38.7	4.3	0.34	26.8	4.2	0.42		2
P354Q	0.1768	22	-52	0.238	0.91								0
T382S	0.6353	22.9	-40		0.132								1
